# Supplementary material for: Non-ambulatory children with cerebral palsy: effects of four months of static and dynamic standing exercise on passive range of motion and spasticity in the hip
Source: PeerJ. 2020 Mar 17;8:e8561. doi: 10.7717/peerj.8561 (PMC7083156; doi:10.7717/peerj.8561)
Supplement: Supplemental Information 1 [file peerj-08-8561-s001.xlsx]

## Sheet: PROM ledrörlighe
B1	Abd höft hö F	Abd höft hö E	Diff abd hö	Abd höft vä F	Abd höft vä E	Diff abd vä	Flex höft hö F	Flex höft hö E	Diff höft hö	Flex höft vä F	Flex höft vä E	Diff höft vä	Hamstrings hö F	Hamstrings hö E	Diff hamstrings hö	Hamstrings vä F	Hamstings vä E	Diff hamstrings vä	Ext knä hö F	Ext knä hö E	Diff ext knä hö	Ext knä vä F	Ext knä vä E	Diff ext knä vä	Dorsalflex hö flekt knä F	Dorsalflex hö flekt knä E	Diff dorsalflex hö flekt knä	Dorsalflex vä flekt knä F	Dorsalflex vä flekt knä E	Diff dorsalflex vä flekt knä	Dorsalflex hö ext knä F	Dorsalflex hö ext knä E	Diff dorsalflex hö ext knä	Dorsalflex vä ext knä F	Dorsalflex vä ext knä E	Diff dorsalflex vä ext knä	IR höft hö F	IR höft hö E	Diff IR höft hö	IR höft vä F	IR höft vä E	Diff IR höft vä	UtR höft hö F	UtR höft hö E	Diff UtR höft hö	UtR höft vä F	UtR höft vä E	Diff UtR höft vä	Elys test hö F
B1_StS 1	35	35	0	45	50	-5	135	135	0	150	150	0	150	150	0	150	160	-10	-25	-20	-5	-15	-20	5	40	40	0	40	40	0	20	20	0	20	20	0	60	60	0	0	0	0	15	25	-10	45	60	-15	130
B1_StS 2	35	40	-5	50	50	0	120	120	0	130	135	-5	140	145	-5	140	145	-5	-30	-25	-5	-25	-25	0	30	30	0	30	25	5	15	20	-5	15	20	-5	20	25	-5	10	10	0	70	60	10	60	70	-10	120
B1_DyS 1	40	45	-5	50	50	0	125	135	-10	130	140	-10	145	150	-5	140	140	0	-25	-15	-10	-25	-25	0	40	40	0	40	40	0	30	30	0	30	30	0	15	25	-10	0	0	0	55	55	0	50	60	-10	130
B1_DyS2	40	50	-10	50	50	0	130	140	-10	130	140	-10	145	150	-5	145	150	-5	-30	-15	-15	-35	-15	-20	30	35	-5	35	40	-5	25	30	-5	25	30	-5	50	50	0	10	10	0	40	60	-20	60	70	-10	120
B3_StS 1	35	35	0	40	40	0	120	120	0	120	120	0	135	135	0	130	135	-5	-20	-20	0	-15	-15	0	35	35	0	25	30	-5	15	20	-5	20	20	0	55	60	-5	55	60	-5	55	55	0	60	60	0	130
B3_StS 2	35	40	-5	40	40	0	140	140	0	140	140	0	135	135	0	135	135	0	-25	-20	-5	-15	-10	-5	35	35	0	35	35	0	10	10	0	15	15	0	70	70	0	70	70	0	70	70	0	70	65	5	140
B3_DyS 1	35	40	-5	40	50	-10	130	140	0	135	140	-5	130	135	-5	130	135	-5	-25	-15	-10	-25	-10	-15	35	40	-5	35	40	-5	20	20	0	15	20	-5	65	65	0	50	60	-10	75	80	-5	75	80	-5	130
B3_DyS2	35	45	-10	35	45	-10	135	145	0	130	145	-15	135	140	-5	140	145	-5	-30	-15	-15	-30	-10	-20	20	30	-10	20	25	-5	15	20	-5	15	20	-5	60	65	-5	55	60	-5	70	80	-10	70	80	-10	125
B5_StS 1	25	25	0	35	40	-5	130	135	-5	135	135	0	150	150	0	155	150	5	0	0	0	0	0	0	35	15	20	25	15	10	0	0	0	10	0	10	50	45	5	45	40	5	70	75	-5	55	65	-10	130
B5_StS 2	45	45	0	45	50	-5	150	150	0	150	150	0	145	150	-5	150	150	0	0	0	0	0	0	0	25	25	0	15	10	5	-5	0	-5	-5	-5	0	60	50	10	60	50	10	70	70	0	70	70	0	140
B5_DyS 1	40	50	-10	50	60	-10	135	145	-10	135	145	-10	130	160	-30	135	165	-30	0	0	0	0	0	0	15	25	-10	10	20	-10	0	10	-10	0	5	-5	60	65	-5	55	60	-5	70	70	0	65	70	-5	60
B5_DyS2	40	50	-10	50	65	-15	135	150	-15	135	140	-5	165	170	-5	170	170	0	0	0	0	0	0	0	15	20	-5	20	25	-5	0	10	-10	-5	5	-10	45	50	-5	50	60	-10	70	70	0	70	70	0	130
B6_StS 1	40	40	0	40	40	0	130	130	0	130	130	0	130	130	0	130	135	-5	-15	-15	0	-15	-15	0	20	25	-5	20	25	-5	0	0	0	0	0	0	70	70	0	70	70	0	70	70	0	70	70	0	140
B6_StS 2	50	50	0	45	45	0	140	140	0	140	130	10	135	135	0	135	130	5	-15	-15	0	-20	-15	-5	25	25	0	20	25	-5	0	0	0	0	0	0	60	60	0	60	60	0	70	75	-5	70	75	-5	140
B6_DyS 1	50	50	0	40	40	0	140	145	-5	135	145	-10	150	150	0	130	140	-10	-15	-10	-5	-15	-5	-10	20	25	-5	20	25	-5	0	5	-5	0	10	0	60	60	0	50	60	-10	70	70	0	70	70	0	140
B6_DyS2	40	40	0	40	45	-5	150	150	0	150	150	0	145	150	-5	140	150	-10	-20	-15	-5	-15	-10	-5	20	25	-5	30	30	0	5	10	-5	10	10	0	50	70	-20	50	70	-20	70	70	0	70	70	0	140
B7_StS 1	25	25	0	30	30	0	105	105	0	110	115	-5	125	125	0	120	120	0	-35	-35	0	-25	-25	0	20	25	-5	25	25	0	10	10	0	10	10	0	35	35	0	30	30	0	50	50	0	40	40	0	75
B7_StS 2	25	25	0	30	25	5	30	30	0	110	100	10	105	110	-5	115	115	0	-35	-35	0	-30	-35	5	20	20	0	10	20	-10	10	10	0	10	10	0	40	40	0	40	40	0	40	50	-10	40	50	-10	95
B7_DyS 1	25	40	-15	25	35	-10	90	95	-5	110	120	-10	110	120	-10	120	130	-10	-40	-30	-10	-35	-30	-5	20	25	-5	25	30	-5	10	15	-5	10	15	-5	30	50	-20	50	60	-10	30	60	-30	40	60	-20	70
B7_DyS2	35	40	-5	35	45	-10	90	100	-10	120	125	-5	125	130	-5	125	135	-10	-35	-30	-5	-30	-25	-5	25	30	-5	20	25	-5	15	20	-5	5	15	-10	50	50	0	40	50	-10	60	70	-10	50	55	-5	70
B8_StS 1	25	25	0	20	20	0	140	140	0	140	140	0	130	130	0	130	130	0	-20	-20	0	-20	-15	-5	20	20	0	20	20	0	10	10	0	10	10	0	40	45	-5	40	50	-10	90	90	0	90	90	0	130
B8_StS 2	40	40	0	40	40	0	140	140	0	140	140	0	140	140	0	140	145	-5	-20	-15	-5	-20	-20	0	25	30	-5	25	25	0	10	10	0	10	10	0	50	40	10	40	30	10	80	80	0	80	90	-10	130
B8_DyS 1	20	25	-5	20	30	-10	130	135	-5	130	135	-5	130	140	-10	150	150	0	-25	-15	-10	-15	-15	0	30	35	-5	35	35	0	20	25	-5	20	30	-10	45	45	0	45	45	0	75	80	-5	75	80	-5	140
B8_DyS2	20	25	-5	20	25	-5	140	140	0	140	140	0	140	160	-20	140	160	-20	-25	-20	-5	-25	-15	-10	20	30	-10	25	30	-5	10	15	-5	10	15	-5	55	60	-5	60	65	-5	80	80	0	80	80	0	150
B9_StS 1	25	30	-5	40	35	5	120	110	10	100	110	-10	125	135	-10	135	135	0	-15	-10	-10	-5	-10	5	25	15	10	15	10	5	5	5	0	0	0	0	50	50	0	50	50	0	70	70	0	70	70	0	125
B9_StS 2	40	40	0	40	40	0	100	100	0	100	100	0	140	140	0	140	140	0	-15	-15	0	-15	-15	0	25	20	5	20	15	5	0	0	0	0	0	0	50	50	0	50	50	0	70	70	0	70	70	0	130
B9_DyS 1	35	45	-10	30	45	-15	130	135	-5	110	130	-20	140	145	-5	140	150	-10	-20	-15	-5	-15	-15	0	15	25	-10	15	20	-5	0	5	-5	5	5	0	50	50	0	50	50	0	70	75	-5	70	75	-5	130
B9_DyS2	40	45	-5	35	45	-10	120	125	-5	130	130	0	125	140	-15	140	145	-5	-15	-10	-5	-20	-10	-10	20	30	-10	15	20	-5	0	10	-10	0	0	0	45	55	-10	45	50	-5	75	75	0	75	75	0	120
B10_StS 1	20	25	-5	20	25	-5	130	135	-5	145	145	0	125	130	-5	130	130	0	-20	-20	0	-10	-20	10	20	20	0	10	15	-5	10	10	0	0	5	-5	40	40	0	60	60	0	60	60	0	30	40	-10	70
B10_StS 2	30	35	-5	25	25	0	120	120	0	120	120	0	135	135	0	135	135	0	-25	-25	0	-10	-10	0	10	15	-5	10	20	-10	0	0	0	0	10	-10	50	55	-5	50	60	-10	60	60	0	70	70	0	50
B10_DyS 1	30	30	0	30	30	0	120	125	-5	120	125	-5	130	140	-10	130	135	-5	-15	-10	-5	-5	-5	0	15	20	-5	15	20	-5	0	0	0	0	5	-5	50	50	0	60	60	0	60	60	0	40	40	0	40
B10_DyS2	20	25	-5	20	30	-10	135	140	-5	140	140	0	140	140	0	140	145	-5	-25	-20	-5	-25	-10	-15	15	25	-10	25	30	-5	0	15	-15	10	25	-15	60	50	10	50	55	-5	50	60	-10	40	50	-10	110
B11_StS 1	30	30	0	30	35	-5	140	140	0	130	135	-5	155	155	0	150	150	0	0	0	0	0	0	0	40	40	0	40	40	0	20	20	0	20	20	0	70	70	0	60	60	0	70	70	0	60	60	0	140
B11_StS 2	30	30	0	40	35	5	130	130	0	130	130	0	155	160	-5	150	150	0	0	0	0	0	0	0	40	40	0	40	40	0	20	20	0	15	20	-5	70	70	0	70	70	0	60	60	0	60	60	0	140
B11_DyS 1	40	40	0	40	40	0	140	145	-5	140	145	-5	150	170	-20	150	170	-20	0	0	0	0	0	0	40	40	0	40	40	0	20	25	-5	20	25	-5	80	80	0	70	70	0	60	70	-10	60	70	-10	140
B11_DyS2	35	45	-10	45	45	0	140	140	0	140	140	0	140	175	-35	140	165	-25	0	0	0	0	0	0	30	40	-10	35	40	-5	30	30	0	25	30	-5	50	60	-10	50	60	-10	70	80	-10	70	80	-10	135
B12_StS 1	50	50	0	45	45	0	130	130	0	130	130	0	130	120	10	125	120	5	-40	-40	0	-35	-35	0	30	40	-10	25	30	-5	25	30	-5	20	20	0	50	60	-10	50	50	0	25	40	-15	35	45	-10	140
B12_StS 2	40	40	0	40	40	0	130	130	0	110	110	0	140	140	0	130	130	0	-35	-40	5	-30	-30	0	30	30	0	30	35	-5	20	20	0	20	20	0	50	55	-5	50	50	0	65	65	0	50	45	5	140
B12_DyS 1	40	45	-5	40	45	-5	140	140	0	140	140	0	105	125	-20	125	140	-15	-50	-40	-10	-35	-20	-15	40	40	0	40	40	0	25	25	0	25	20	5	50	50	0	55	60	-5	60	60	0	45	50	-5	140
B12_DyS2	30	40	-10	40	50	-10	120	135	-15	110	125	-15	120	120	0	125	130	-5	-40	-35	-5	-30	-25	-5	40	45	-5	35	40	-5	20	25	-5	20	25	-5	50	50	0	50	60	-10	40	65	-25	40	50	-10	140
B13_StS 1	35	40	-5	35	30	5	130	130	0	120	125	-5	155	155	0	155	155	0	-2	0	-2	-2	0	-2	25	30	-5	20	25	-5	15	15	0	10	10	0	65	65	0	65	70	-5	45	50	-5	55	55	0	135
B13_StS 2	30	30	0	25	25	0	130	130	0	125	130	-5	150	150	0	150	155	-5	0	0	0	0	0	0	30	30	0	25	20	5	10	10	0	10	10	0	60	55	5	40	40	0	40	40	0	60	65	-5	140
B13_DyS 1	30	40	-10	10	20	-10	120	135	-15	125	140	-15	135	145	-10	150	160	-10	-20	-10	-10	-15	-10	-5	10	30	-20	20	35	-15	0	10	-10	0	15	-15	45	50	-5	55	60	-5	40	60	-20	40	50	-10	140
B13_DyS2	30	40	-10	25	30	-5	130	140	-10	130	140	-10	130	150	-20	135	150	-15	-10	-5	-5	-10	-5	-5	20	25	-5	25	30	-5	10	15	-5	10	15	-5	50	65	-15	60	60	0	45	55	-10	40	60	-20	140
B14_StS 1	35	35	0	40	40	0	130	130	0	130	130	0	140	140	0	130	140	-10	-25	-20	-5	-25	-20	-5	25	30	-5	20	25	-5	5	10	-5	10	10	0	60	60	0	50	50	0	40	60	-20	50	50	0	120
B14_StS 2	30	30	0	40	40	0	120	120	0	130	135	-5	140	135	5	140	130	10	-25	-20	-5	-20	-20	0	25	25	0	20	25	-5	5	10	-5	15	15	0	55	50	5	55	50	5	60	55	5	60	60	0	120
B14_DyS 1	35	40	-5	40	40	0	130	130	0	125	130	-5	140	140	0	140	140	0	-15	-10	-5	-20	-15	-5	25	35	-10	35	35	0	10	15	-5	20	25	-5	65	70	-5	65	70	-5	55	60	-5	60	60	0	110
B14_DyS2	35	40	-5	30	40	-10	120	135	-15	100	130	-30	140	145	-5	130	155	-25	-10	-5	-5	-15	-10	-5	30	35	-5	35	35	0	15	25	-10	15	25	-10	50	55	-5	50	65	-15	50	60	-10	50	65	-15	140
B15_StS 1	45	40	5	30	30	0	135	135	0	135	135	0	135	135	0	140	135	5	0	0	0	0	0	0	25	25	0	25	25	0	10	10	0	10	10	0	60	60	0	50	50	0	70	70	0	70	70	0	140
B15_StS 2	40	40	0	40	40	0	140	140	0	140	140	0	160	160	0	150	150	0	0	0	0	0	0	0	35	30	5	30	30	0	10	10	0	10	10	0	70	70	0	70	70	0	70	70	0	70	70	0	140
B15_DyS 1	35	35	0	30	35	-5	130	135	-5	130	135	-5	140	150	-10	130	155	-25	0	0	0	0	0	0	30	30	0	25	30	-5	10	20	-10	10	20	-10	70	70	0	70	70	0	50	60	-10	50	65	-15	140
B15_DyS2	40	45	-5	40	45	-5	140	140	0	140	140	0	140	150	-10	140	155	-15	0	0	0	0	0	0	20	35	-15	20	30	-10	10	20	-10	10	10	0	80	80	0	80	80	0	70	70	0	70	70	0	140
B16_StS 1	30	30	0	0	5	-5	65	65	0	50	55	-5	130	120	10	130	120	10	-30	-25	-5	-15	-15	0	15	20	-5	15	15	0	10	10	0	0	5	-5	30	35	-5	40	30	10	0	10	-10	10	15	-5	70
B16_StS 2	40	40	0	10	20	-10	75	80	-5	70	70	0	130	135	-5	130	130	0	-25	-25	0	-15	-15	0	15	15	0	10	15	-5	0	5	-5	0	5	-5	10	10	0	20	25	-5	30	30	0	20	20	0	80
B16_DyS 1	40	40	0	15	20	-5	70	90	-20	70	80	-10	130	145	-15	130	140	-10	-20	-10	-10	-10	0	-10	20	20	0	25	30	-5	10	15	-5	10	15	-5	35	60	-25	30	30	0	20	30	-10	15	25	-10	45
B16_DyS2	40	50	-10	15	30	-15	80	85	-5	60	70	-10	130	140	-10	130	145	-15	-20	-10	-5	-10	-5	-5	20	25	-5	15	20	-5	10	15	-5	0	10	-10	45	50	-5	20	30	-10	30	35	-5	40	70	-30	80
B17_StS 1	40	40	0	40	45	-5	130	130	0	130	130	0	150	150	0	150	150	0	0	0	0	0	0	0	40	40	0	40	40	0	20	20	0	20	20	0	65	65	0	65	65	0	75	75	0	75	75	0	150
B17_StS 2	40	40	0	40	40	0	150	150	0	150	150	0	135	135	0	145	140	5	0	0	0	0	0	0	30	30	0	35	35	0	15	20	-5	20	20	0	70	70	0	70	70	0	70	70	0	70	70	0	150
B17_DyS 1	35	40	-5	40	40	0	145	145	0	145	145	0	145	150	-5	140	150	-10	0	0	0	0	0	0	30	35	-5	30	35	-5	15	20	-5	15	20	-5	80	80	0	70	80	-10	65	70	-5	60	70	-10	145
B17_DyS2	35	40	-5	40	45	-5	140	140	0	130	140	-10	145	150	-5	155	160	-5	0	0	0	0	0	0	30	40	-10	35	40	-5	20	25	-5	25	25	0	70	70	0	70	70	0	70	75	-5	60	65	-5	150
B18_StS 1	35	35	0	35	35	0	140	140	0	140	140	0	160	160	0	160	160	0	0	0	0	0	0	0	20	25	-5	20	25	-5	0	0	0	0	0	0	70	80	-10	70	80	-10	70	70	0	70	70	0	140
B18_StS 2	40	40	0	40	40	0	130	130	0	130	130	0	165	170	-5	165	170	-5	0	0	0	0	0	0	20	20	0	20	20	0	5	0	5	5	0	5	50	60	-10	50	50	0	70	70	0	70	70	0	140
B18_DyS 1	30	35	-5	30	35	-5	135	135	0	130	135	-5	155	170	-15	150	160	-10	0	0	0	0	0	0	25	35	-10	25	30	-5	0	5	-5	0	0	0	70	70	0	70	70	0	40	45	-5	45	50	-5	130
B18_DyS2	30	45	-15	30	45	-15	140	140	0	140	140	0	160	180	-20	160	180	-20	0	0	0	0	0	0	30	30	0	20	25	-5	0	5	-5	0	5	-5	70	70	0	70	70	0	40	60	-20	40	60	-20	140
B20_StS 1	30	30	0	40	40	0	120	110	10	110	100	10	120	110	10	120	120	0	-35	-35	0	-35	-35	0	25	25	0	25	25	0	15	20	-5	15	20	-5	30	30	0	30	30	0	60	60	0	70	70	0	70
B20_StS 2	40	45	-5	40	45	-5	100	100	0	90	90	0	130	130	0	120	110	10	-15	-15	0	-35	-35	0	20	30	-10	20	25	-5	15	15	0	15	15	0	40	40	0	40	40	0	70	70	0	70	70	0	100
B20_DyS 1	30	40	-10	25	35	-10	110	130	-20	110	120	-10	120	125	-5	110	120	-10	-25	-20	-5	-40	-25	-15	25	30	-5	15	20	-5	5	20	-15	0	10	-10	20	25	-5	25	30	-5	35	50	-15	50	60	-10	70
B20_DyS2	30	35	-5	25	35	-10	100	130	-30	85	120	-35	135	140	-5	120	130	-10	-25	-15	-10	-30	-25	-5	25	30	-5	30	30	0	20	25	-5	15	20	-5	40	50	-10	30	40	-10	80	80	0	80	80	0	80
B21_StS 1	30	30	0	5	5	0	130	130	0	130	135	-5	125	130	-5	120	130	-10	-20	-15	-5	-40	-40	0	25	25	0	30	30	0	5	10	-5	15	15	0	50	55	-5	55	60	-5	50	50	0	20	30	-10	100
B21_StS 2	30	30	0	20	20	0	130	130	0	120	120	0	115	115	0	130	130	0	-15	-15	0	-40	-40	0	30	30	0	30	30	0	5	5	0	10	10	0	45	45	0	45	45	0	45	45	0	20	20	0	80
B21_DyS 1	30	35	-5	25	25	0	140	140	0	140	140	0	125	135	-10	135	140	-5	-15	-15	0	-35	-25	-10	30	35	-5	30	30	0	15	15	0	15	20	-5	50	55	-5	40	50	-10	55	60	-5	35	45	-10	100
B21_DyS2	20	30	-10	20	40	-20	110	130	-20	130	140	-10	145	150	-5	140	145	-5	-15	-10	-5	-30	-15	-15	25	30	-5	20	30	-10	10	20	-10	10	20	-10	40	45	-5	45	50	-5	50	55	-5	30	45	-15	120
B22_StS 1	25	30	-5	30	30	0	130	130	0	130	130	0	110	100	10	110	110	0	-40	-40	0	-35	-40	5	15	15	0	30	30	0	0	0	0	0	0	0	40	40	0	40	40	0	70	70	0	70	70	0	130
B22_StS 2	35	30	5	35	35	0	125	130	-5	125	125	0	110	110	0	120	120	0	-40	-40	0	-35	-35	0	25	30	-5	20	20	0	0	0	0	10	5	5	45	50	-5	45	45	0	70	70	0	70	70	0	140
B22_DyS 1	30	35	-5	20	25	-5	135	150	-15	120	140	-20	105	130	-25	110	130	-20	-30	-30	0	-35	-30	-5	35	35	0	35	35	0	15	20	-5	20	25	-5	65	65	0	55	60	-5	45	70	-25	50	65	-15	140
B22_DyS2	20	30	-10	30	35	-5	120	130	-10	130	140	-10	115	125	-10	120	120	0	-35	-35	0	-40	-30	-10	15	25	-10	20	25	-5	0	5	-5	10	15	-5	40	45	-5	40	45	-5	60	70	-10	60	70	-10	125
B23_StS 1	25	30	-5	30	30	0	75	70	5	80	80	0	125	130	-5	140	140	0	-5	-5	0	-20	-15	-5	35	35	0	30	30	0	5	5	0	15	15	0	30	35	-5	40	25	15	60	55	5	55	60	-5	40
B23_StS 2	35	35	0	30	30	0	70	70	0	90	90	0	140	145	-5	140	135	5	-5	-5	0	-20	-15	-5	20	20	0	20	20	0	15	15	0	15	15	0	40	50	-10	50	60	-10	50	60	-10	60	70	-10	60
B23_DyS 1	20	25	-5	20	35	-15	50	70	-20	80	90	-10	150	160	-10	140	150	-10	-15	-5	-10	-15	-5	-10	25	30	-5	20	25	-5	5	15	-10	0	20	-20	30	40	-10	50	50	0	60	70	-10	35	60	-25	60
B23_DyS2	30	35	-5	15	25	-10	70	80	-10	90	115	-25	130	140	-10	125	135	-10	-5	0	-5	-10	5	-15	20	25	-5	25	30	-5	5	15	-10	10	15	-5	20	30	-10	60	70	-10	60	70	-10	30	50	-20	50
[truncated: 11 more columns]

## Sheet: StS
StS	StS Abd höft hö F	StS Abd höft hö E	StS Diff abd hö	StS Abd höft vä F	StS Abd höft vä E	StS Diff abd vä	StS Flex höft hö F	StS Flex höft hö E	StS Diff höft hö	StS Flex höft vä F	StS Flex höft vä E	StS Diff höft vä	StS Hamstrings hö F	StS Hamstrings hö E	StS Diff hamstrings hö	StS Hamstrings vä F	StS Hamstings vä E	StS Diff hamstrings vä	StS Ext knä hö F	StS Ext knä hö E	StS Diff ext knä hö	StS Ext knä vä F	StS Ext knä vä E	StS Diff ext knä vä	StS Dorsalflex hö flekt knä F	StS Dorsalflex hö flekt knä E	StS Diff dorsalflex hö flekt knä	StS Dorsalflex vä flekt knä F	StS Dorsalflex vä flekt knä E	StS Diff dorsalflex vä flekt knä	StS Dorsalflex hö ext knä F	StS Dorsalflex hö ext knä E	StS Diff dorsalflex hö ext knä	StS Dorsalflex vä ext knä F	StS Dorsalflex vä ext knä E	StS Diff dorsalflex vä ext knä	StS IR höft hö F	StS IR höft hö E	StS Diff IR höft hö	StS IR höft vä F	StS IR höft vä E	StS Diff IR höft vä	StS UtR höft hö F	StS UtR höft hö E	StS Diff UtR höft hö	StS UtR höft vä F	StS UtR höft vä E	StS Diff UtR höft vä	StS Elys test hö F
B1_StS 1	35	35	0	45	50	-5	135	135	0	150	150	0	150	150	0	150	160	-10	-25	-20	-5	-15	-20	5	40	40	0	40	40	0	20	20	0	20	20	0	60	60	0	0	0	0	15	25	-10	45	60	-15	130
B1_StS 2	35	40	-5	50	50	0	120	120	0	130	135	-5	140	145	-5	140	145	-5	-30	-25	-5	-25	-25	0	30	30	0	30	25	5	15	20	-5	15	20	-5	20	25	-5	10	10	0	70	60	10	60	70	-10	120
B3_StS 1	35	35	0	40	40	0	120	120	0	120	120	0	135	135	0	130	135	-5	-20	-20	0	-15	-15	0	35	35	0	25	30	-5	15	20	-5	20	20	0	55	60	-5	55	60	-5	55	55	0	60	60	0	130
B3_StS 2	35	40	-5	40	40	0	140	140	0	140	140	0	135	135	0	135	135	0	-25	-20	-5	-15	-10	-5	35	35	0	35	35	0	10	10	0	15	15	0	70	70	0	70	70	0	70	70	0	70	65	5	140
B5_StS 1	25	25	0	35	40	-5	130	135	-5	135	135	0	150	150	0	155	150	5	0	0	0	0	0	0	35	15	20	25	15	10	0	0	0	10	0	10	50	45	5	45	40	5	70	75	-5	55	65	-10	130
B5_StS 2	45	45	0	45	50	-5	150	150	0	150	150	0	145	150	-5	150	150	0	0	0	0	0	0	0	25	25	0	15	10	5	-5	0	-5	-5	-5	0	60	50	10	60	50	10	70	70	0	70	70	0	140
B6_StS 1	40	40	0	40	40	0	130	130	0	130	130	0	130	130	0	130	135	-5	-15	-15	0	-15	-15	0	20	25	-5	20	25	-5	0	0	0	0	0	0	70	70	0	70	70	0	70	70	0	70	70	0	140
B6_StS 2	50	50	0	45	45	0	140	140	0	140	130	10	135	135	0	135	130	5	-15	-15	0	-20	-15	-5	25	25	0	20	25	-5	0	0	0	0	0	0	60	60	0	60	60	0	70	75	-5	70	75	-5	140
B7_StS 1	25	25	0	30	30	0	105	105	0	110	115	-5	125	125	0	120	120	0	-35	-35	0	-25	-25	0	20	25	-5	25	25	0	10	10	0	10	10	0	35	35	0	30	30	0	50	50	0	40	40	0	75
B7_StS 2	25	25	0	30	25	5	30	30	0	110	100	10	105	110	-5	115	115	0	-35	-35	0	-30	-35	5	20	20	0	10	20	-10	10	10	0	10	10	0	40	40	0	40	40	0	40	50	-10	40	50	-10	95
B8_StS 1	25	25	0	20	20	0	140	140	0	140	140	0	130	130	0	130	130	0	-20	-20	0	-20	-15	-5	20	20	0	20	20	0	10	10	0	10	10	0	40	45	-5	40	50	-10	90	90	0	90	90	0	130
B8_StS 2	40	40	0	40	40	0	140	140	0	140	140	0	140	140	0	140	145	-5	-20	-15	-5	-20	-20	0	25	30	-5	25	25	0	10	10	0	10	10	0	50	40	10	40	30	10	80	80	0	80	90	-10	130
B9_StS 1	25	30	-5	40	35	5	120	110	10	100	110	-10	125	135	-10	135	135	0	-15	-10	-10	-5	-10	5	25	15	10	15	10	5	5	5	0	0	0	0	50	50	0	50	50	0	70	70	0	70	70	0	125
B9_StS 2	40	40	0	40	40	0	100	100	0	100	100	0	140	140	0	140	140	0	-15	-15	0	-15	-15	0	25	20	5	20	15	5	0	0	0	0	0	0	50	50	0	50	50	0	70	70	0	70	70	0	130
B10_StS 1	20	25	-5	20	25	-5	130	135	-5	145	145	0	125	130	-5	130	130	0	-20	-20	0	-10	-20	10	20	20	0	10	15	-5	10	10	0	0	5	-5	40	40	0	60	60	0	60	60	0	30	40	-10	70
B10_StS 2	30	35	-5	25	25	0	120	120	0	120	120	0	135	135	0	135	135	0	-25	-25	0	-10	-10	0	10	15	-5	10	20	-10	0	0	0	0	10	-10	50	55	-5	50	60	-10	60	60	0	70	70	0	50
B11_StS 1	30	30	0	30	35	-5	140	140	0	130	135	-5	155	155	0	150	150	0	0	0	0	0	0	0	40	40	0	40	40	0	20	20	0	20	20	0	70	70	0	60	60	0	70	70	0	60	60	0	140
B11_StS 2	30	30	0	40	35	5	130	130	0	130	130	0	155	160	-5	150	150	0	0	0	0	0	0	0	40	40	0	40	40	0	20	20	0	15	20	-5	70	70	0	70	70	0	60	60	0	60	60	0	140
B12_StS 1	50	50	0	45	45	0	130	130	0	130	130	0	130	120	10	125	120	5	-40	-40	0	-35	-35	0	30	40	-10	25	30	-5	25	30	-5	20	20	0	50	60	-10	50	50	0	25	40	-15	35	45	-10	140
B12_StS 2	40	40	0	40	40	0	130	130	0	110	110	0	140	140	0	130	130	0	-35	-40	5	-30	-30	0	30	30	0	30	35	-5	20	20	0	20	20	0	50	55	-5	50	50	0	65	65	0	50	45	5	140
B13_StS 1	35	40	-5	35	30	5	130	130	0	120	125	-5	155	155	0	155	155	0	-2	0	-2	-2	0	-2	25	30	-5	20	25	-5	15	15	0	10	10	0	65	65	0	65	70	-5	45	50	-5	55	55	0	135
B13_StS 2	30	30	0	25	25	0	130	130	0	125	130	-5	150	150	0	150	155	-5	0	0	0	0	0	0	30	30	0	25	20	5	10	10	0	10	10	0	60	55	5	40	40	0	40	40	0	60	65	-5	140
B14_StS 1	35	35	0	40	40	0	130	130	0	130	130	0	140	140	0	130	140	-10	-25	-20	-5	-25	-20	-5	25	30	-5	20	25	-5	5	10	-5	10	10	0	60	60	0	50	50	0	40	60	-20	50	50	0	120
B14_StS 2	30	30	0	40	40	0	120	120	0	130	135	-5	140	135	5	140	130	10	-25	-20	-5	-20	-20	0	25	25	0	20	25	-5	5	10	-5	15	15	0	55	50	5	55	50	5	60	55	5	60	60	0	120
B15_StS 1	45	40	5	30	30	0	135	135	0	135	135	0	135	135	0	140	135	5	0	0	0	0	0	0	25	25	0	25	25	0	10	10	0	10	10	0	60	60	0	50	50	0	70	70	0	70	70	0	140
B15_StS 2	40	40	0	40	40	0	140	140	0	140	140	0	160	160	0	150	150	0	0	0	0	0	0	0	35	30	5	30	30	0	10	10	0	10	10	0	70	70	0	70	70	0	70	70	0	70	70	0	140
B16_StS 1	30	30	0	0	5	-5	65	65	0	50	55	-5	130	120	10	130	120	10	-30	-25	-5	-15	-15	0	15	20	-5	15	15	0	10	10	0	0	5	-5	30	35	-5	40	30	10	0	10	-10	10	15	-5	70
B16_StS 2	40	40	0	10	20	-10	75	80	-5	70	70	0	130	135	-5	130	130	0	-25	-25	0	-15	-15	0	15	15	0	10	15	-5	0	5	-5	0	5	-5	10	10	0	20	25	-5	30	30	0	20	20	0	80
B17_StS 1	40	40	0	40	45	-5	130	130	0	130	130	0	150	150	0	150	150	0	0	0	0	0	0	0	40	40	0	40	40	0	20	20	0	20	20	0	65	65	0	65	65	0	75	75	0	75	75	0	150
B17_StS 2	40	40	0	40	40	0	150	150	0	150	150	0	135	135	0	145	140	5	0	0	0	0	0	0	30	30	0	35	35	0	15	20	-5	20	20	0	70	70	0	70	70	0	70	70	0	70	70	0	150
B18_StS 1	35	35	0	35	35	0	140	140	0	140	140	0	160	160	0	160	160	0	0	0	0	0	0	0	20	25	-5	20	25	-5	0	0	0	0	0	0	70	80	-10	70	80	-10	70	70	0	70	70	0	140
B18_StS 2	40	40	0	40	40	0	130	130	0	130	130	0	165	170	-5	165	170	-5	0	0	0	0	0	0	20	20	0	20	20	0	5	0	5	5	0	5	50	60	-10	50	50	0	70	70	0	70	70	0	140
B20_StS 1	30	30	0	40	40	0	120	110	10	110	100	10	120	110	10	120	120	0	-35	-35	0	-35	-35	0	25	25	0	25	25	0	15	20	-5	15	20	-5	30	30	0	30	30	0	60	60	0	70	70	0	70
B20_StS 2	40	45	-5	40	45	-5	100	100	0	90	90	0	130	130	0	120	110	10	-15	-15	0	-35	-35	0	20	30	-10	20	25	-5	15	15	0	15	15	0	40	40	0	40	40	0	70	70	0	70	70	0	100
B21_StS 1	30	30	0	5	5	0	130	130	0	130	135	-5	125	130	-5	120	130	-10	-20	-15	-5	-40	-40	0	25	25	0	30	30	0	5	10	-5	15	15	0	50	55	-5	55	60	-5	50	50	0	20	30	-10	100
B21_StS 2	30	30	0	20	20	0	130	130	0	120	120	0	115	115	0	130	130	0	-15	-15	0	-40	-40	0	30	30	0	30	30	0	5	5	0	10	10	0	45	45	0	45	45	0	45	45	0	20	20	0	80
B22_StS 1	25	30	-5	30	30	0	130	130	0	130	130	0	110	100	10	110	110	0	-40	-40	0	-35	-40	5	15	15	0	30	30	0	0	0	0	0	0	0	40	40	0	40	40	0	70	70	0	70	70	0	130
B22_StS 2	35	30	5	35	35	0	125	130	-5	125	125	0	110	110	0	120	120	0	-40	-40	0	-35	-35	0	25	30	-5	20	20	0	0	0	0	10	5	5	45	50	-5	45	45	0	70	70	0	70	70	0	140
B23_StS 1	25	30	-5	30	30	0	75	70	5	80	80	0	125	130	-5	140	140	0	-5	-5	0	-20	-15	-5	35	35	0	30	30	0	5	5	0	15	15	0	30	35	-5	40	25	15	60	55	5	55	60	-5	40
B23_StS 2	35	35	0	30	30	0	70	70	0	90	90	0	140	145	-5	140	135	5	-5	-5	0	-20	-15	-5	20	20	0	20	20	0	15	15	0	15	15	0	40	50	-10	50	60	-10	50	60	-10	60	70	-10	60
[truncated: 11 more columns]

## Sheet: SPSS
StS	StS1 Abd höft hö F	StS1 Abd höft hö E	StS1 Diff abd hö	StS1 Abd höft vä F	StS1 Abd höft vä E	StS1 Diff abd vä	StS1 Flex höft hö F	StS1 Flex höft hö E	StS1 Diff höft hö	StS1 Flex höft vä F	StS1 Flex höft vä E	StS1 Diff höft vä	StS1 Hamstrings hö F	StS1 Hamstrings hö E	StS1 Diff hamstrings hö	StS1 Hamstrings vä F	StS1 Hamstings vä E	StS1 Diff hamstrings vä	StS1 Ext knä hö F	StS1 Ext knä hö E	StS1 Diff ext knä hö	StS1 Ext knä vä F	StS1 Ext knä vä E	StS1 Diff ext knä vä	StS1 Dorsalflex hö flekt knä F	StS1 Dorsalflex hö flekt knä E	StS1 Diff dorsalflex hö flekt knä	StS1 Dorsalflex vä flekt knä F	StS1 Dorsalflex vä flekt knä E	StS1 Diff dorsalflex vä flekt knä	StS1 Dorsalflex hö ext knä F	StS1 Dorsalflex hö ext knä E	StS1 Diff dorsalflex hö ext knä	StS1 Dorsalflex vä ext knä F	StS1 Dorsalflex vä ext knä E	StS1 Diff dorsalflex vä ext knä	StS1 IR höft hö F	StS1 IR höft hö E	StS1 Diff IR höft hö	StS1 IR höft vä F	StS1 IR höft vä E	StS1 Diff IR höft vä	StS1 UtR höft hö F	StS1 UtR höft hö E	StS1 Diff UtR höft hö	StS1 UtR höft vä F	StS1 UtR höft vä E	StS1 Diff UtR höft vä	StS1 Elys test hö F
B1	35	35	0	45	50	-5	135	135	0	150	150	0	150	150	0	150	160	-10	-25	-20	-5	-15	-20	5	40	40	0	40	40	0	20	20	0	20	20	0	60	60	0	0	0	0	15	25	-10	45	60	-15	130
B3	35	35	0	40	40	0	120	120	0	120	120	0	135	135	0	130	135	-5	-20	-20	0	-15	-15	0	35	35	0	25	30	-5	15	20	-5	20	20	0	55	60	-5	55	60	-5	55	55	0	60	60	0	130
B5	25	25	0	35	40	-5	130	135	-5	135	135	0	150	150	0	155	150	5	0	0	0	0	0	0	35	15	20	25	15	10	0	0	0	10	0	10	50	45	5	45	40	5	70	75	-5	55	65	-10	130
B6	40	40	0	40	40	0	130	130	0	130	130	0	130	130	0	130	135	-5	-15	-15	0	-15	-15	0	20	25	-5	20	25	-5	0	0	0	0	0	0	70	70	0	70	70	0	70	70	0	70	70	0	140
B7	25	25	0	30	30	0	105	105	0	110	115	-5	125	125	0	120	120	0	-35	-35	0	-25	-25	0	20	25	-5	25	25	0	10	10	0	10	10	0	35	35	0	30	30	0	50	50	0	40	40	0	75
B8	25	25	0	20	20	0	140	140	0	140	140	0	130	130	0	130	130	0	-20	-20	0	-20	-15	-5	20	20	0	20	20	0	10	10	0	10	10	0	40	45	-5	40	50	-10	90	90	0	90	90	0	130
B9	25	30	-5	40	35	5	120	110	10	100	110	-10	125	135	-10	135	135	0	-15	-10	-10	-5	-10	5	25	15	10	15	10	5	5	5	0	0	0	0	50	50	0	50	50	0	70	70	0	70	70	0	125
B19	20	25	-5	20	25	-5	130	135	-5	145	145	0	125	130	-5	130	130	0	-20	-20	0	-10	-20	10	20	20	0	10	15	-5	10	10	0	0	5	-5	40	40	0	60	60	0	60	60	0	30	40	-10	70
B11	30	30	0	30	35	-5	140	140	0	130	135	-5	155	155	0	150	150	0	0	0	0	0	0	0	40	40	0	40	40	0	20	20	0	20	20	0	70	70	0	60	60	0	70	70	0	60	60	0	140
B12	50	50	0	45	45	0	130	130	0	130	130	0	130	120	10	125	120	5	-40	-40	0	-35	-35	0	30	40	-10	25	30	-5	25	30	-5	20	20	0	50	60	-10	50	50	0	25	40	-15	35	45	-10	140
B13	35	40	-5	35	30	5	130	130	0	120	125	-5	155	155	0	155	155	0	-2	0	-2	-2	0	-2	25	30	-5	20	25	-5	15	15	0	10	10	0	65	65	0	65	70	-5	45	50	-5	55	55	0	135
B14	35	35	0	40	40	0	130	130	0	130	130	0	140	140	0	130	140	-10	-25	-20	-5	-25	-20	-5	25	30	-5	20	25	-5	5	10	-5	10	10	0	60	60	0	50	50	0	40	60	-20	50	50	0	120
B15	45	40	5	30	30	0	135	135	0	135	135	0	135	135	0	140	135	5	0	0	0	0	0	0	25	25	0	25	25	0	10	10	0	10	10	0	60	60	0	50	50	0	70	70	0	70	70	0	140
B16	30	30	0	0	5	-5	65	65	0	50	55	-5	130	120	10	130	120	10	-30	-25	-5	-15	-15	0	15	20	-5	15	15	0	10	10	0	0	5	-5	30	35	-5	40	30	10	0	10	-10	10	15	-5	70
B17	40	40	0	40	45	-5	130	130	0	130	130	0	150	150	0	150	150	0	0	0	0	0	0	0	40	40	0	40	40	0	20	20	0	20	20	0	65	65	0	65	65	0	75	75	0	75	75	0	150
B18	35	35	0	35	35	0	140	140	0	140	140	0	160	160	0	160	160	0	0	0	0	0	0	0	20	25	-5	20	25	-5	0	0	0	0	0	0	70	80	-10	70	80	-10	70	70	0	70	70	0	140
B20	30	30	0	40	40	0	120	110	10	110	100	10	120	110	10	120	120	0	-35	-35	0	-35	-35	0	25	25	0	25	25	0	15	20	-5	15	20	-5	30	30	0	30	30	0	60	60	0	70	70	0	70
B21	30	30	0	5	5	0	130	130	0	130	135	-5	125	130	-5	120	130	-10	-20	-15	-5	-40	-40	0	25	25	0	30	30	0	5	10	-5	15	15	0	50	55	-5	55	60	-5	50	50	0	20	30	-10	100
B22	25	30	-5	30	30	0	130	130	0	130	130	0	110	100	10	110	110	0	-40	-40	0	-35	-40	5	15	15	0	30	30	0	0	0	0	0	0	0	40	40	0	40	40	0	70	70	0	70	70	0	130
B23	25	30	-5	30	30	0	75	70	5	80	80	0	125	130	-5	140	140	0	-5	-5	0	-20	-15	-5	35	35	0	30	30	0	5	5	0	15	15	0	30	35	-5	40	25	15	60	55	5	55	60	-5	40
[truncated: 191 more columns]

## Sheet: DyS
B1	Dys Abd höft hö F	Dys Abd höft hö E	Dys Diff abd hö	Dys Abd höft vä F	Dys Abd höft vä E	Dys Diff abd vä	Dys Flex höft hö F	Dys Flex höft hö E	Dys Diff höft hö	Dys Flex höft vä F	Dys Flex höft vä E	Dys Diff höft vä	Dys Hamstrings hö F	Dys Hamstrings hö E	Dys Diff hamstrings hö	Dys Hamstrings vä F	Dys Hamstings vä E	Dys Diff hamstrings vä	Dys Ext knä hö F	Dys Ext knä hö E	Dys Diff ext knä hö	Dys Ext knä vä F	Dys Ext knä vä E	Dys Diff ext knä vä	Dys Dorsalflex hö flekt knä F	Dys Dorsalflex hö flekt knä E	Dys Diff dorsalflex hö flekt knä	Dys Dorsalflex vä flekt knä F	Dys Dorsalflex vä flekt knä E	Dys Diff dorsalflex vä flekt knä	Dys Dorsalflex hö ext knä F	Dys Dorsalflex hö ext knä E	Dys Diff dorsalflex hö ext knä	Dys Dorsalflex vä ext knä F	Dys Dorsalflex vä ext knä E	Dys Diff dorsalflex vä ext knä	Dys IR höft hö F	Dys IR höft hö E	Dys Diff IR höft hö	Dys IR höft vä F	Dys IR höft vä E	Dys Diff IR höft vä	Dys UtR höft hö F	Dys UtR höft hö E	Dys Diff UtR höft hö	Dys UtR höft vä F	Dys UtR höft vä E	Dys Diff UtR höft vä	Dys Elys test hö F
B1_DyS 1	40	45	-5	50	50	0	125	135	-10	130	140	-10	145	150	-5	140	140	0	-25	-15	-10	-25	-25	0	40	40	0	40	40	0	30	30	0	30	30	0	15	25	-10	0	0	0	55	55	0	50	60	-10	130
B1_DyS2	40	50	-10	50	50	0	130	140	-10	130	140	-10	145	150	-5	145	150	-5	-30	-15	-15	-35	-15	-20	30	35	-5	35	40	-5	25	30	-5	25	30	-5	50	50	0	10	10	0	40	60	-20	60	70	-10	120
B3_DyS 1	35	40	-5	40	50	-10	130	140	0	135	140	-5	130	135	-5	130	135	-5	-25	-15	-10	-25	-10	-15	35	40	-5	35	40	-5	20	20	0	15	20	-5	65	65	0	50	60	-10	75	80	-5	75	80	-5	130
B3_DyS2	35	45	-10	35	45	-10	135	145	0	130	145	-15	135	140	-5	140	145	-5	-30	-15	-15	-30	-10	-20	20	30	-10	20	25	-5	15	20	-5	15	20	-5	60	65	-5	55	60	-5	70	80	-10	70	80	-10	125
B5_DyS 1	40	50	-10	50	60	-10	135	145	-10	135	145	-10	130	160	-30	135	165	-30	0	0	0	0	0	0	15	25	-10	10	20	-10	0	10	-10	0	5	-5	60	65	-5	55	60	-5	70	70	0	65	70	-5	60
B5_DyS2	40	50	-10	50	65	-15	135	150	-15	135	140	-5	165	170	-5	170	170	0	0	0	0	0	0	0	15	20	-5	20	25	-5	0	10	-10	-5	5	-10	45	50	-5	50	60	-10	70	70	0	70	70	0	130
B6_DyS 1	50	50	0	40	40	0	140	145	-5	135	145	-10	150	150	0	130	140	-10	-15	-10	-5	-15	-5	-10	20	25	-5	20	25	-5	0	5	-5	0	10	0	60	60	0	50	60	-10	70	70	0	70	70	0	140
B6_DyS2	40	40	0	40	45	-5	150	150	0	150	150	0	145	150	-5	140	150	-10	-20	-15	-5	-15	-10	-5	20	25	-5	30	30	0	5	10	-5	10	10	0	50	70	-20	50	70	-20	70	70	0	70	70	0	140
B7_DyS 1	25	40	-15	25	35	-10	90	95	-5	110	120	-10	110	120	-10	120	130	-10	-40	-30	-10	-35	-30	-5	20	25	-5	25	30	-5	10	15	-5	10	15	-5	30	50	-20	50	60	-10	30	60	-30	40	60	-20	70
B7_DyS2	35	40	-5	35	45	-10	90	100	-10	120	125	-5	125	130	-5	125	135	-10	-35	-30	-5	-30	-25	-5	25	30	-5	20	25	-5	15	20	-5	5	15	-10	50	50	0	40	50	-10	60	70	-10	50	55	-5	70
B8_DyS 1	20	25	-5	20	30	-10	130	135	-5	130	135	-5	130	140	-10	150	150	0	-25	-15	-10	-15	-15	0	30	35	-5	35	35	0	20	25	-5	20	30	-10	45	45	0	45	45	0	75	80	-5	75	80	-5	140
B8_DyS2	20	25	-5	20	25	-5	140	140	0	140	140	0	140	160	-20	140	160	-20	-25	-20	-5	-25	-15	-10	20	30	-10	25	30	-5	10	15	-5	10	15	-5	55	60	-5	60	65	-5	80	80	0	80	80	0	150
B9_DyS 1	35	45	-10	30	45	-15	130	135	-5	110	130	-20	140	145	-5	140	150	-10	-20	-15	-5	-15	-15	0	15	25	-10	15	20	-5	0	5	-5	5	5	0	50	50	0	50	50	0	70	75	-5	70	75	-5	130
B9_DyS2	40	45	-5	35	45	-10	120	125	-5	130	130	0	125	140	-15	140	145	-5	-15	-10	-5	-20	-10	-10	20	30	-10	15	20	-5	0	10	-10	0	0	0	45	55	-10	45	50	-5	75	75	0	75	75	0	120
B10_DyS 1	30	30	0	30	30	0	120	125	-5	120	125	-5	130	140	-10	130	135	-5	-15	-10	-5	-5	-5	0	15	20	-5	15	20	-5	0	0	0	0	5	-5	50	50	0	60	60	0	60	60	0	40	40	0	40
B10_DyS2	20	25	-5	20	30	-10	135	140	-5	140	140	0	140	140	0	140	145	-5	-25	-20	-5	-25	-10	-15	15	25	-10	25	30	-5	0	15	-15	10	25	-15	60	50	10	50	55	-5	50	60	-10	40	50	-10	110
B11_DyS 1	40	40	0	40	40	0	140	145	-5	140	145	-5	150	170	-20	150	170	-20	0	0	0	0	0	0	40	40	0	40	40	0	20	25	-5	20	25	-5	80	80	0	70	70	0	60	70	-10	60	70	-10	140
B11_DyS2	35	45	-10	45	45	0	140	140	0	140	140	0	140	175	-35	140	165	-25	0	0	0	0	0	0	30	40	-10	35	40	-5	30	30	0	25	30	-5	50	60	-10	50	60	-10	70	80	-10	70	80	-10	135
B12_DyS 1	40	45	-5	40	45	-5	140	140	0	140	140	0	105	125	-20	125	140	-15	-50	-40	-10	-35	-20	-15	40	40	0	40	40	0	25	25	0	25	20	5	50	50	0	55	60	-5	60	60	0	45	50	-5	140
B12_DyS2	30	40	-10	40	50	-10	120	135	-15	110	125	-15	120	120	0	125	130	-5	-40	-35	-5	-30	-25	-5	40	45	-5	35	40	-5	20	25	-5	20	25	-5	50	50	0	50	60	-10	40	65	-25	40	50	-10	140
B13_DyS 1	30	40	-10	10	20	-10	120	135	-15	125	140	-15	135	145	-10	150	160	-10	-20	-10	-10	-15	-10	-5	10	30	-20	20	35	-15	0	10	-10	0	15	-15	45	50	-5	55	60	-5	40	60	-20	40	50	-10	140
B13_DyS2	30	40	-10	25	30	-5	130	140	-10	130	140	-10	130	150	-20	135	150	-15	-10	-5	-5	-10	-5	-5	20	25	-5	25	30	-5	10	15	-5	10	15	-5	50	65	-15	60	60	0	45	55	-10	40	60	-20	140
B14_DyS 1	35	40	-5	40	40	0	130	130	0	125	130	-5	140	140	0	140	140	0	-15	-10	-5	-20	-15	-5	25	35	-10	35	35	0	10	15	-5	20	25	-5	65	70	-5	65	70	-5	55	60	-5	60	60	0	110
B14_DyS2	35	40	-5	30	40	-10	120	135	-15	100	130	-30	140	145	-5	130	155	-25	-10	-5	-5	-15	-10	-5	30	35	-5	35	35	0	15	25	-10	15	25	-10	50	55	-5	50	65	-15	50	60	-10	50	65	-15	140
B15_DyS 1	35	35	0	30	35	-5	130	135	-5	130	135	-5	140	150	-10	130	155	-25	0	0	0	0	0	0	30	30	0	25	30	-5	10	20	-10	10	20	-10	70	70	0	70	70	0	50	60	-10	50	65	-15	140
B15_DyS2	40	45	-5	40	45	-5	140	140	0	140	140	0	140	150	-10	140	155	-15	0	0	0	0	0	0	20	35	-15	20	30	-10	10	20	-10	10	10	0	80	80	0	80	80	0	70	70	0	70	70	0	140
B16_DyS 1	40	40	0	15	20	-5	70	90	-20	70	80	-10	130	145	-15	130	140	-10	-20	-10	-10	-10	0	-10	20	20	0	25	30	-5	10	15	-5	10	15	-5	35	60	-25	30	30	0	20	30	-10	15	25	-10	45
B16_DyS2	40	50	-10	15	30	-15	80	85	-5	60	70	-10	130	140	-10	130	145	-15	-20	-10	-5	-10	-5	-5	20	25	-5	15	20	-5	10	15	-5	0	10	-10	45	50	-5	20	30	-10	30	35	-5	40	70	-30	80
B17_DyS 1	35	40	-5	40	40	0	145	145	0	145	145	0	145	150	-5	140	150	-10	0	0	0	0	0	0	30	35	-5	30	35	-5	15	20	-5	15	20	-5	80	80	0	70	80	-10	65	70	-5	60	70	-10	145
B17_DyS2	35	40	-5	40	45	-5	140	140	0	130	140	-10	145	150	-5	155	160	-5	0	0	0	0	0	0	30	40	-10	35	40	-5	20	25	-5	25	25	0	70	70	0	70	70	0	70	75	-5	60	65	-5	150
B18_DyS 1	30	35	-5	30	35	-5	135	135	0	130	135	-5	155	170	-15	150	160	-10	0	0	0	0	0	0	25	35	-10	25	30	-5	0	5	-5	0	0	0	70	70	0	70	70	0	40	45	-5	45	50	-5	130
B18_DyS2	30	45	-15	30	45	-15	140	140	0	140	140	0	160	180	-20	160	180	-20	0	0	0	0	0	0	30	30	0	20	25	-5	0	5	-5	0	5	-5	70	70	0	70	70	0	40	60	-20	40	60	-20	140
B20_DyS 1	30	40	-10	25	35	-10	110	130	-20	110	120	-10	120	125	-5	110	120	-10	-25	-20	-5	-40	-25	-15	25	30	-5	15	20	-5	5	20	-15	0	10	-10	20	25	-5	25	30	-5	35	50	-15	50	60	-10	70
B20_DyS2	30	35	-5	25	35	-10	100	130	-30	85	120	-35	135	140	-5	120	130	-10	-25	-15	-10	-30	-25	-5	25	30	-5	30	30	0	20	25	-5	15	20	-5	40	50	-10	30	40	-10	80	80	0	80	80	0	80
B21_DyS 1	30	35	-5	25	25	0	140	140	0	140	140	0	125	135	-10	135	140	-5	-15	-15	0	-35	-25	-10	30	35	-5	30	30	0	15	15	0	15	20	-5	50	55	-5	40	50	-10	55	60	-5	35	45	-10	100
B21_DyS2	20	30	-10	20	40	-20	110	130	-20	130	140	-10	145	150	-5	140	145	-5	-15	-10	-5	-30	-15	-15	25	30	-5	20	30	-10	10	20	-10	10	20	-10	40	45	-5	45	50	-5	50	55	-5	30	45	-15	120
B22_DyS 1	30	35	-5	20	25	-5	135	150	-15	120	140	-20	105	130	-25	110	130	-20	-30	-30	0	-35	-30	-5	35	35	0	35	35	0	15	20	-5	20	25	-5	65	65	0	55	60	-5	45	70	-25	50	65	-15	140
B22_DyS2	20	30	-10	30	35	-5	120	130	-10	130	140	-10	115	125	-10	120	120	0	-35	-35	0	-40	-30	-10	15	25	-10	20	25	-5	0	5	-5	10	15	-5	40	45	-5	40	45	-5	60	70	-10	60	70	-10	125
B23_DyS 1	20	25	-5	20	35	-15	50	70	-20	80	90	-10	150	160	-10	140	150	-10	-15	-5	-10	-15	-5	-10	25	30	-5	20	25	-5	5	15	-10	0	20	-20	30	40	-10	50	50	0	60	70	-10	35	60	-25	60
B23_DyS2	30	35	-5	15	25	-10	70	80	-10	90	115	-25	130	140	-10	125	135	-10	-5	0	-5	-10	5	-15	20	25	-5	25	30	-5	5	15	-10	10	15	-5	20	30	-10	60	70	-10	60	70	-10	30	50	-20	50
[truncated: 11 more columns]

## Sheet: DyS 1
B1	Dy1s Abd höft hö F	Dys1 Abd höft hö E	Dys1 Diff abd hö	Dys1 Abd höft vä F	Dys1 Abd höft vä E	Dys1 Diff abd vä	Dys1 Flex höft hö F	Dys1 Flex höft hö E	Dys1 Diff höft hö	Dys1 Flex höft vä F	Dys1 Flex höft vä E	Dys1 Diff höft vä	Dys1 Hamstrings hö F	Dys1 Hamstrings hö E	Dys1 Diff hamstrings hö	Dys1 Hamstrings vä F	Dys1 Hamstings vä E	Dys1 Diff hamstrings vä	Dys1 Ext knä hö F	Dys1 Ext knä hö E	Dys1 Diff ext knä hö	Dys1 Ext knä vä F	Dys1 Ext knä vä E	Dys1 Diff ext knä vä	Dys1 Dorsalflex hö flekt knä F	Dys1 Dorsalflex hö flekt knä E	Dys1 Diff dorsalflex hö flekt knä	Dys1 Dorsalflex vä flekt knä F	Dys1 Dorsalflex vä flekt knä E	Dys1 Diff dorsalflex vä flekt knä	Dys1 Dorsalflex hö ext knä F	Dys1 Dorsalflex hö ext knä E	Dys1 Diff dorsalflex hö ext knä	Dys1 Dorsalflex vä ext knä F	Dys1 Dorsalflex vä ext knä E	Dys1 Diff dorsalflex vä ext knä	Dys1 IR höft hö F	Dys1 IR höft hö E	Dys1 Diff IR höft hö	Dys1 IR höft vä F	Dys1 IR höft vä E	Dys1 Diff IR höft vä	Dys1 UtR höft hö F	Dys1 UtR höft hö E	Dys1 Diff UtR höft hö	Dys1 UtR höft vä F	Dys1 UtR höft vä E	Dys1 Diff UtR höft vä	Dys1 Elys test hö F
B1_DyS 1	40	45	-5	50	50	0	125	135	-10	130	140	-10	145	150	-5	140	140	0	-25	-15	-10	-25	-25	0	40	40	0	40	40	0	30	30	0	30	30	0	15	25	-10	0	0	0	55	55	0	50	60	-10	130
B3_DyS 1	35	40	-5	40	50	-10	130	140	0	135	140	-5	130	135	-5	130	135	-5	-25	-15	-10	-25	-10	-15	35	40	-5	35	40	-5	20	20	0	15	20	-5	65	65	0	50	60	-10	75	80	-5	75	80	-5	130
B5_DyS 1	40	50	-10	50	60	-10	135	145	-10	135	145	-10	130	160	-30	135	165	-30	0	0	0	0	0	0	15	25	-10	10	20	-10	0	10	-10	0	5	-5	60	65	-5	55	60	-5	70	70	0	65	70	-5	60
B6_DyS 1	50	50	0	40	40	0	140	145	-5	135	145	-10	150	150	0	130	140	-10	-15	-10	-5	-15	-5	-10	20	25	-5	20	25	-5	0	5	-5	0	10	0	60	60	0	50	60	-10	70	70	0	70	70	0	140
B7_DyS 1	25	40	-15	25	35	-10	90	95	-5	110	120	-10	110	120	-10	120	130	-10	-40	-30	-10	-35	-30	-5	20	25	-5	25	30	-5	10	15	-5	10	15	-5	30	50	-20	50	60	-10	30	60	-30	40	60	-20	70
B8_DyS 1	20	25	-5	20	30	-10	130	135	-5	130	135	-5	130	140	-10	150	150	0	-25	-15	-10	-15	-15	0	30	35	-5	35	35	0	20	25	-5	20	30	-10	45	45	0	45	45	0	75	80	-5	75	80	-5	140
B9_DyS 1	35	45	-10	30	45	-15	130	135	-5	110	130	-20	140	145	-5	140	150	-10	-20	-15	-5	-15	-15	0	15	25	-10	15	20	-5	0	5	-5	5	5	0	50	50	0	50	50	0	70	75	-5	70	75	-5	130
B10_DyS 1	30	30	0	30	30	0	120	125	-5	120	125	-5	130	140	-10	130	135	-5	-15	-10	-5	-5	-5	0	15	20	-5	15	20	-5	0	0	0	0	5	-5	50	50	0	60	60	0	60	60	0	40	40	0	40
B11_DyS 1	40	40	0	40	40	0	140	145	-5	140	145	-5	150	170	-20	150	170	-20	0	0	0	0	0	0	40	40	0	40	40	0	20	25	-5	20	25	-5	80	80	0	70	70	0	60	70	-10	60	70	-10	140
B12_DyS 1	40	45	-5	40	45	-5	140	140	0	140	140	0	105	125	-20	125	140	-15	-50	-40	-10	-35	-20	-15	40	40	0	40	40	0	25	25	0	25	20	5	50	50	0	55	60	-5	60	60	0	45	50	-5	140
B13_DyS 1	30	40	-10	10	20	-10	120	135	-15	125	140	-15	135	145	-10	150	160	-10	-20	-10	-10	-15	-10	-5	10	30	-20	20	35	-15	0	10	-10	0	15	-15	45	50	-5	55	60	-5	40	60	-20	40	50	-10	140
B14_DyS 1	35	40	-5	40	40	0	130	130	0	125	130	-5	140	140	0	140	140	0	-15	-10	-5	-20	-15	-5	25	35	-10	35	35	0	10	15	-5	20	25	-5	65	70	-5	65	70	-5	55	60	-5	60	60	0	110
B15_DyS 1	35	35	0	30	35	-5	130	135	-5	130	135	-5	140	150	-10	130	155	-25	0	0	0	0	0	0	30	30	0	25	30	-5	10	20	-10	10	20	-10	70	70	0	70	70	0	50	60	-10	50	65	-15	140
B16_DyS 1	40	40	0	15	20	-5	70	90	-20	70	80	-10	130	145	-15	130	140	-10	-20	-10	-10	-10	0	-10	20	20	0	25	30	-5	10	15	-5	10	15	-5	35	60	-25	30	30	0	20	30	-10	15	25	-10	45
B17_DyS 1	35	40	-5	40	40	0	145	145	0	145	145	0	145	150	-5	140	150	-10	0	0	0	0	0	0	30	35	-5	30	35	-5	15	20	-5	15	20	-5	80	80	0	70	80	-10	65	70	-5	60	70	-10	145
B18_DyS 1	30	35	-5	30	35	-5	135	135	0	130	135	-5	155	170	-15	150	160	-10	0	0	0	0	0	0	25	35	-10	25	30	-5	0	5	-5	0	0	0	70	70	0	70	70	0	40	45	-5	45	50	-5	130
B20_DyS 1	30	40	-10	25	35	-10	110	130	-20	110	120	-10	120	125	-5	110	120	-10	-25	-20	-5	-40	-25	-15	25	30	-5	15	20	-5	5	20	-15	0	10	-10	20	25	-5	25	30	-5	35	50	-15	50	60	-10	70
B21_DyS 1	30	35	-5	25	25	0	140	140	0	140	140	0	125	135	-10	135	140	-5	-15	-15	0	-35	-25	-10	30	35	-5	30	30	0	15	15	0	15	20	-5	50	55	-5	40	50	-10	55	60	-5	35	45	-10	100
B22_DyS 1	30	35	-5	20	25	-5	135	150	-15	120	140	-20	105	130	-25	110	130	-20	-30	-30	0	-35	-30	-5	35	35	0	35	35	0	15	20	-5	20	25	-5	65	65	0	55	60	-5	45	70	-25	50	65	-15	140
B23_DyS 1	20	25	-5	20	35	-15	50	70	-20	80	90	-10	150	160	-10	140	150	-10	-15	-5	-10	-15	-5	-10	25	30	-5	20	25	-5	5	15	-10	0	20	-20	30	40	-10	50	50	0	60	70	-10	35	60	-25	60
[truncated: 11 more columns]

## Sheet: StS 1
StS	StS1 Abduction Before	StS1 Abduction After	StS1 Flexion Before	StS1 Flexion After	StS1 Inward rotation Before	StS1 Inward rotation After	StS1 Outward rotation Before	StS1 Outward rotation After	StS1 Elys test Before	StS1 Elys test After	StS1 Extension Before	StS1 Extion After
B1_R	35	35	135	135	60	60	15	25	130	130	-5	-5
B1_L	45	50	150	150	0	0	45	60	130	130	-10	-5
B3_R	35	35	120	120	55	60	55	55	130	130	10	10
B3_L	40	40	120	120	55	60	60	60	130	130	10	10
B5_R	25	25	130	135	50	45	70	75	130	130	25	25
B5_L	35	40	135	135	45	40	55	65	115	120	25	30
B6_R	40	40	130	130	70	70	70	70	140	140	0	5
B6_L	40	40	130	130	70	70	70	70	140	140	0	5
B7_R	25	25	105	105	35	35	50	50	75	75	-10	-10
B7_L	30	30	110	115	30	30	40	40	80	80	-15	-15
B8_R	25	25	140	140	40	45	90	90	130	130	-5	-5
B8_L	20	20	140	140	40	50	90	90	130	135	-5	-5
B9_R	25	30	120	110	50	50	70	70	125	130	0	0
B9_L	40	35	100	110	50	50	70	70	130	130	10	5
B10_R	20	25	130	135	40	40	60	60	70	70	0	0
B10_L	20	25	145	145	60	60	30	40	50	60	0	0
B11_R	30	30	140	140	70	70	70	70	140	140	0	0
B11_L	30	35	130	135	60	60	60	60	140	140	15	10
B12_R	50	50	130	130	50	60	25	40	140	140	-5	5
B12_L	45	45	130	130	50	50	35	45	140	140	-5	0
B13_R	35	40	130	130	65	65	45	50	135	140	15	15
B13_L	35	30	120	125	65	70	55	55	135	140	15	15
B14_R	35	35	130	130	60	60	40	60	120	120	10	10
B14_L	40	40	130	130	50	50	50	50	120	120	0	0
B15_R	45	40	135	135	60	60	70	70	140	140	25	25
B15_L	30	30	135	135	50	50	70	70	140	140	25	25
B16_R	30	30	65	65	30	35	0	10	70	70	-20	-20
B16_L	0	5	50	55	40	30	10	15	65	65	-5	-5
B17_R	40	40	130	130	65	65	75	75	150	150	25	25
B17_L	40	45	130	130	65	65	75	75	150	150	25	25
B18_R	35	35	140	140	70	80	70	70	140	140	10	10
B18_L	35	35	140	140	70	80	70	70	140	140	10	10
B20_R	30	30	120	110	30	30	60	60	70	70	0	0
B20_L	40	40	110	100	30	30	70	70	100	100	10	10
B21_R	30	30	130	130	50	55	50	50	100	80	-25	-20
B21_L	5	5	130	135	55	60	20	30	110	110	-25	-20
B22_R	25	30	130	130	40	40	70	70	130	130	-20	-5
B22_L	30	30	130	130	40	40	70	70	130	140	-10	-10
B23_R	25	30	75	70	30	35	60	55	40	45	20	20
B23_L	30	30	80	80	40	25	55	60	45	45	10	10

## Sheet: StS 2 
StS	StS2 Abduction Before	StS2 Abduction After	StS2 Flexion Before	StS2 Flexion After	StS2 Inward rotation Before	StS2 Inward rotation After	StS2 Outward rotation Before	StS2 Outward rotation After	StS2 Elys test Before	StS2 Elys test After	StS2 Extension Before	StS2 Extion After
B1_R	35	40	120	120	20	25	70	60	120	120	-10	0
B1_L	50	50	130	135	10	10	60	70	120	120	-20	-20
B3_R	35	40	140	140	70	70	70	70	140	130	10	15
B3_L	40	40	140	140	70	70	70	65	140	135	15	15
B5_R	45	45	150	150	60	50	70	70	140	140	15	15
B5_L	45	50	150	150	60	50	70	70	140	140	20	20
B6_R	50	50	140	140	60	60	70	75	140	140	20	20
B6_L	45	45	140	130	60	60	70	75	140	140	20	20
B7_R	25	25	30	30	40	40	40	50	95	90	-5	-5
B7_L	30	25	110	100	40	40	40	50	100	90	-5	-5
B8_R	40	40	140	140	50	40	80	80	130	135	-10	-5
B8_L	40	40	140	140	40	30	80	90	130	130	-10	-10
B9_R	40	40	100	100	50	50	70	70	130	130	15	10
B9_L	40	40	100	100	50	50	70	70	130	130	15	10
B10_R	30	35	120	120	50	55	60	60	50	60	10	10
B10_L	25	25	120	120	50	60	70	70	50	60	10	10
B11_R	30	30	130	130	70	70	60	60	140	140	10	15
B11_L	40	35	130	130	70	70	60	60	140	140	10	15
B12_R	40	40	130	130	50	55	65	65	140	140	0	5
B12_L	40	40	110	110	50	50	50	45	140	140	0	5
B13_R	30	30	130	130	60	55	40	40	140	140	10	15
B13_L	25	25	125	130	40	40	60	65	140	140	10	15
B14_R	30	30	120	120	55	50	60	55	120	125	10	15
B14_L	40	40	130	135	55	50	60	60	120	125	10	15
B15_R	40	40	140	140	70	70	70	70	140	140	20	20
B15_L	40	40	140	140	70	70	70	70	140	140	20	20
B16_R	40	40	75	80	10	10	30	30	80	80	-10	-15
B16_L	10	20	70	70	20	25	20	20	80	80	-10	-10
B17_R	40	40	150	150	70	70	70	70	150	150	15	20
B17_L	40	40	150	150	70	70	70	70	150	150	15	20
B18_R	40	40	130	130	50	60	70	70	140	140	20	20
B18_L	40	40	130	130	50	50	70	70	140	140	20	20
B20_R	40	45	100	100	40	40	70	70	100	80	10	10
B20_L	40	45	90	90	40	40	70	70	100	80	10	10
B21_R	30	30	130	130	45	45	45	45	80	80	-15	-15
B21_L	20	20	120	120	45	45	20	20	100	100	-15	-20
B22_R	35	30	125	130	45	50	70	70	140	140	-15	-15
B22_L	35	35	125	125	45	45	70	70	135	135	-10	-10
B23_R	35	35	70	70	40	50	50	60	60	65	10	15
B23_L	30	30	90	90	50	60	60	70	70	75	5	5

## Sheet: DyS 1 
DyS	DyS1 Abduction Before	DyS1 Abduction After	DyS1 Flexion Before	DyS1 Flexion After	DyS1 Inward rotation Before	DyS1 Inward rotation After	DyS1 Outward rotation Before	DyS1 Outward rotation After	DyS1 Elys test Before	DyS1 Elys test After	DyS1 Extension Before	DyS1 Extion After
B1_R	40	45	125	135	15	25	55	55	130	135	-15	0
B1_L	50	50	130	140	0	0	50	60	135	135	-10	0
B3_R	35	40	130	140	65	65	75	80	130	140	-5	5
B3_L	40	50	135	140	50	60	75	80	130	140	0	10
B5_R	40	50	135	145	60	65	70	70	60	80	15	25
B5_L	50	60	135	145	55	60	65	70	60	80	15	30
B6_R	50	50	140	145	60	60	70	70	140	140	10	15
B6_L	40	40	135	145	50	60	70	70	140	140	10	15
B7_R	25	40	90	95	30	50	30	60	70	70	-15	-5
B7_L	25	35	110	120	50	60	40	60	70	75	-20	-10
B8_R	20	25	130	135	45	45	75	80	140	140	-10	-5
B8_L	20	30	130	135	45	45	75	80	140	140	-10	0
B9_R	35	45	130	135	50	50	70	75	130	140	0	10
B9_L	30	45	110	130	50	50	70	75	130	140	0	5
B10_R	30	30	120	125	50	50	60	60	40	60	0	10
B10_L	30	30	120	125	60	60	40	40	50	40	0	10
B11_R	40	40	140	145	80	80	60	70	140	140	20	30
B11_L	40	40	140	145	70	70	60	70	140	140	20	30
B12_R	40	45	140	140	50	50	60	60	140	140	10	10
B12_L	40	45	140	140	55	60	45	50	140	140	10	10
B13_R	30	40	120	135	45	50	40	60	140	145	0	20
B13_L	10	20	125	140	55	60	40	50	140	145	0	15
B14_R	35	40	130	130	65	70	55	60	110	140	10	20
B14_L	40	40	125	130	65	70	60	60	120	130	10	15
B15_R	35	35	130	135	70	70	50	60	140	140	10	15
B15_L	30	35	130	135	70	70	50	65	140	140	10	15
B16_R	40	40	70	90	35	60	20	30	45	80	-15	0
B16_L	15	20	70	80	30	30	15	25	70	85	-15	0
B17_R	35	40	145	145	80	80	65	70	145	145	20	20
B17_L	40	40	145	145	70	80	60	70	145	145	15	20
B18_R	30	35	135	135	70	70	40	45	130	130	20	20
B18_L	30	35	130	135	70	70	45	50	130	130	20	20
B20_R	30	40	110	130	20	25	35	50	70	90	5	10
B20_L	25	35	110	120	25	30	50	60	80	90	10	10
B21_R	30	35	140	140	50	55	55	60	100	110	-10	-5
B21_L	25	25	140	140	40	50	35	45	100	110	-20	-15
B22_R	30	35	135	150	65	65	45	70	140	140	-15	-5
B22_L	20	25	120	140	55	60	50	65	140	140	-15	0
B23_R	20	25	50	70	30	40	60	70	60	90	-20	10
B23_L	20	35	80	90	50	50	35	60	40	80	0	10

## Sheet: DyS 2
DyS	DyS2 Abduction Before	DyS2 Abduction After	DyS2 Flexion Before	DyS2 Flexion After	DyS2 Inward rotation Before	DyS2 Inward rotation After	DyS2 Outward rotation Before	DyS2 Outward rotation After	DyS2 Elys test Before	DyS2 Elys test After	DyS2 Extension Before	DyS2 Extion After
B1_R	40	50	130	140	50	50	40	60	120	130	-5	0
B1_L	50	50	130	140	10	10	60	70	120	130	15	20
B3_R	35	45	135	145	60	65	70	80	125	140	15	20
B3_L	35	45	130	145	55	60	70	80	125	140	15	20
B5_R	40	50	135	150	45	50	70	70	130	145	20	25
B5_L	50	65	135	140	50	60	70	70	120	145	20	20
B6_R	40	40	150	150	50	70	70	70	140	140	10	15
B6_L	40	45	150	150	50	70	70	70	140	140	5	10
B7_R	35	40	90	100	50	50	60	70	70	70	-10	-5
B7_L	35	45	120	125	40	50	50	55	70	70	-10	-5
B8_R	20	25	140	140	55	60	80	80	150	150	-10	0
B8_L	20	25	140	140	60	65	80	80	150	150	-20	-10
B9_R	40	45	120	125	45	55	75	75	120	130	10	15
B9_L	35	45	130	130	45	50	75	75	120	130	10	15
B10_R	20	25	135	140	60	50	50	60	110	130	0	10
B10_L	20	30	140	140	50	55	40	50	110	130	0	10
B11_R	35	45	140	140	50	60	70	80	135	140	15	20
B11_L	45	45	140	140	50	60	70	80	135	140	15	20
B12_R	30	40	120	135	50	50	40	65	140	140	-5	10
B12_L	40	50	110	125	50	60	40	50	140	140	0	15
B13_R	30	40	130	140	50	65	45	55	140	145	15	15
B13_L	25	30	130	140	60	60	40	60	140	145	15	15
B14_R	35	40	120	135	50	55	50	60	140	140	0	10
B14_L	30	40	100	130	50	65	50	65	130	140	0	10
B15_R	40	45	140	140	80	80	70	70	140	140	10	20
B15_L	40	45	140	140	80	80	70	70	140	140	10	20
B16_R	40	50	80	85	45	50	30	35	80	85	-20	-10
B16_L	15	30	60	70	20	30	40	70	60	80	0	0
B17_R	35	40	140	140	70	70	70	75	150	150	20	25
B17_L	40	45	130	140	70	70	60	65	150	150	20	25
B18_R	30	45	140	140	70	70	40	60	140	140	20	20
B18_L	30	45	140	140	70	70	40	60	140	140	20	20
B20_R	30	35	100	130	40	50	80	80	80	90	-5	10
B20_L	25	35	85	120	30	40	80	80	90	110	-10	10
B21_R	20	30	110	130	40	45	50	55	120	125	-10	-5
B21_L	20	40	130	140	45	50	30	45	120	125	-25	-20
B22_R	20	30	120	130	40	45	60	70	125	140	-10	0
B22_L	30	35	130	140	40	45	60	70	135	140	-10	0
B23_R	30	35	70	80	20	30	60	70	50	70	0	10
B23_L	15	25	90	115	60	70	30	50	60	80	5	15
