# Supplementary material for: Non-ambulatory children with cerebral palsy: effects of four months of static and dynamic standing exercise on passive range of motion and spasticity in the hip
Source: PeerJ. 2020 Mar 17;8:e8561. doi: 10.7717/peerj.8561 (PMC7083156; doi:10.7717/peerj.8561)
Supplement: Supplemental Information 2 [file peerj-08-8561-s002.xlsx]

## Sheet: StS1
StS1	StS1_Extension Before	StS1_Extension After	StS1_Flexion Before	StS1_Flexion After	StS1_Abduction Before	StS1_Abduction After
B1_R	3	2	1	1	0	0
B1_L	2	0	1	1	0	0
B3_R	1	2	2	0	1	2
B3_L	1	2	1	0	1	2
B5_R	1	2	1	2	5	5
B5_L	1	2	1	2	5	5
B6_R	3	2	0	1	1	2
B6_L	2	2	0	1	1	2
B7_R	3	3	2	2	1	1
B7_L	1	1	1	1	2	1
B8_R	2	0	1	0	5	4
B6_L	2	0	1	0	5	4
B9_R	0	0	0	0	1	1
B9_L	0	0	0	0	1	1
B10_R	5	5	3	5	3	4
B10_L	5	3	3	3	3	3
B11_R	0	1	0	1	2	2
B11_L	1	1	1	1	2	1
B12_R	2	1	1	2	2	2
B12_L	3	2	1	1	1	1
B13_R	1	1	1	1	1	1
B13_L	1	2	1	1	1	1
B14_R	4	2	2	2	1	1
B14_L	4	2	1	2	1	1
B15_R	0	1	0	0	4	2
B15_L	0	1	0	0	4	2
B16_R	0	1	0	1	0	1
B16_L	0	1	0	0	4	4
B17_R	0	0	0	0	0	0
B17_L	0	0	0	0	0	0
B18_R	0	0	0	0	2	1
B18_L	0	0	0	0	2	1
B20_R	5	5	5	5	4	3
B20_L	3	4	3	4	4	3
B21_R	2	1	1	1	4	2
B21_L	1	1	0	1	4	2
B22_R	3	4	1	4	4	5
B22_L	2	4	1	4	4	5
B23_R	5	5	1	1	4	4
B32_L	5	3	1	1	4	4

## Sheet: StS 2
StS2	StS2_Extension Before	StS2_Extension After	StS2_Flexion Before	StS2_Flexion After	StS2_Abduction Before	StS2_Abduction After
B1_R	4	4	4	3	2	3
B1_L	1	1	1	2	2	2
B3_R	2	3	0	0	1	1
B3_L	1	2	0	0	1	1
B5_R	4	5	0	4	3	2
B5_L	3	4	0	1	3	2
B6_R	3	2	1	1	2	3
B6_L	3	2	1	1	2	3
B7_R	4	5	2	1	2	3
B7_L	3	4	1	1	2	3
B8_R	0	0	0	0	3	2
B6_L	0	0	0	0	3	2
B9_R	1	1	0	0	0	1
B9_L	1	1	0	0	0	1
B10_R	4	3	4	3	4	4
B10_L	3	3	3	3	3	4
B11_R	0	0	0	0	0	0
B11_L	0	0	0	0	0	0
B12_R	3	2	2	1	1	1
B12_L	1	1	0	0	0	0
B13_R	4	3	0	1	2	2
B13_L	3	2	0	0	2	2
B14_R	3	3	3	1	2	1
B14_L	4	3	3	1	2	1
B15_R	1	1	0	0	2	2
B15_L	1	1	0	0	2	2
B16_R	2	2	1	1	1	1
B16_L	1	1	0	0	2	1
B17_R	0	0	1	1	1	1
B17_L	0	0	1	1	1	1
B18_R	0	0	0	0	2	1
B18_L	0	0	0	0	2	1
B20_R	4	4	3	3	4	4
B20_L	4	4	3	4	2	3
B21_R	2	1	3	3	5	3
B21_L	2	2	0	1	4	4
B22_R	4	4	4	3	5	4
B22_L	4	4	4	3	5	5
B23_R	5	4	5	4	5	3
B32_L	5	4	5	4	5	3

## Sheet: DyS 1
DyS1	DyS1_Extension Before	DyS1_Extension After	DyS1_Flexion Before	DyS1_Flexion After	DyS1_Abduction Before	DyS1_Abduction After
B1_R	2	0	0	0	0	0
B1_L	1	0	0	0	0	0
B3_R	2	1	3	1	3	0
B3_L	2	1	3	1	3	0
B5_R	3	4	2	2	2	1
B5_L	5	5	3	2	2	1
B6_R	1	0	0	0	2	1
B6_L	1	0	0	0	2	1
B7_R	3	4	3	4	3	2
B7_L	3	1	3	1	2	1
B8_R	2	1	1	1	5	1
B6_L	2	1	1	1	5	1
B9_R	0	0	0	0	0	0
B9_L	0	0	0	0	0	0
B10_R	4	2	4	2	5	3
B10_L	4	2	4	2	5	3
B11_R	0	0	0	0	1	0
B11_L	0	0	0	0	1	0
B12_R	2	1	2	1	2	0
B12_L	1	1	1	0	2	0
B13_R	1	1	0	0	2	1
B13_L	2	1	0	0	2	1
B14_R	1	1	1	0	2	1
B14_L	4	2	1	0	3	1
B15_R	1	0	0	0	3	0
B15_L	1	0	0	0	3	0
B16_R	2	1	2	0	1	0
B16_L	3	2	3	1	1	0
B17_R	0	0	0	0	1	0
B17_L	0	0	0	0	1	1
B18_R	0	0	0	0	1	1
B18_L	0	0	0	0	2	1
B20_R	5	3	3	1	1	1
B20_L	3	2	3	0	1	1
B21_R	1	0	0	0	5	1
B21_L	0	0	0	0	5	1
B22_R	2	1	2	1	5	4
B22_L	3	1	3	1	5	3
B23_R	5	3	3	1	4	2
B32_L	3	1	1	0	4	2

## Sheet: DYS 2
DyS2	DyS2_Extension Before	DyS2_Extension After	DyS2_Flexion Before	DyS2_Flexion After	DyS2_Abduction Before	DyS2_Abduction After
B1_R	1	0	1	0	1	0
B1_L	0	0	0	0	1	0
B3_R	1	1	0	0	2	1
B3_L	2	1	0	0	2	1
B5_R	3	1	0	0	2	0
B5_L	3	1	0	0	2	0
B6_R	2	0	1	0	1	1
B6_L	1	0	0	0	1	1
B7_R	5	2	5	1	3	1
B7_L	4	2	4	1	1	1
B8_R	0	0	0	0	3	1
B6_L	0	0	0	0	3	1
B9_R	0	0	0	0	0	0
B9_L	0	0	0	0	0	0
B10_R	5	3	2	2	5	2
B10_L	3	3	2	2	5	2
B11_R	2	0	1	0	3	0
B11_L	2	0	1	0	3	0
B12_R	2	2	3	0	2	0
B12_L	1	0	3	1	2	0
B13_R	3	1	1	0	3	2
B13_L	3	1	1	0	3	2
B14_R	1	0	2	1	4	2
B14_L	2	0	1	2	4	2
B15_R	1	1	1	0	1	0
B15_L	1	1	1	0	1	0
B16_R	1	0	1	0	1	1
B16_L	4	1	3	1	3	0
B17_R	2	0	0	0	1	0
B17_L	1	0	0	0	1	0
B18_R	0	0	0	0	0	0
B18_L	0	0	0	0	0	0
B20_R	5	3	4	2	2	1
B20_L	5	2	2	2	2	1
B21_R	0	0	0	0	2	1
B21_L	0	0	0	0	3	1
B22_R	3	1	3	1	5	3
B22_L	3	1	2	1	5	3
B23_R	5	3	5	3	5	3
B32_L	4	3	4	3	5	3
